# Supplementary material for: Prebiotic inulin nanocoating for pancreatic islet surface engineering
Source: Royal Society of Chemistry journal article supplement (doi:10.1039/d2bm01009g), 2022-12-19
Supplement: d2bm01009g1.pdf [file d2bm01009g1.pdf]

## Supplementary Figures

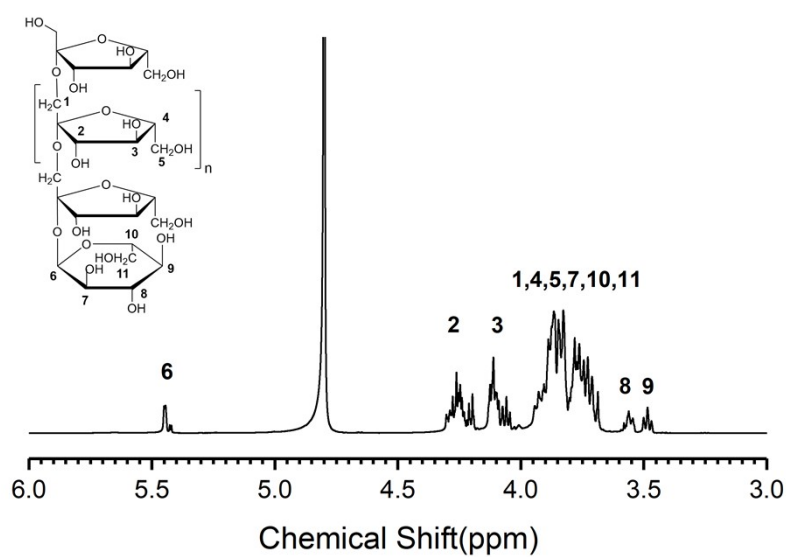

**Supplementary Figure 1.**  $^1\text{H}$  NMR spectrum of inulin in  $\text{D}_2\text{O}$ .

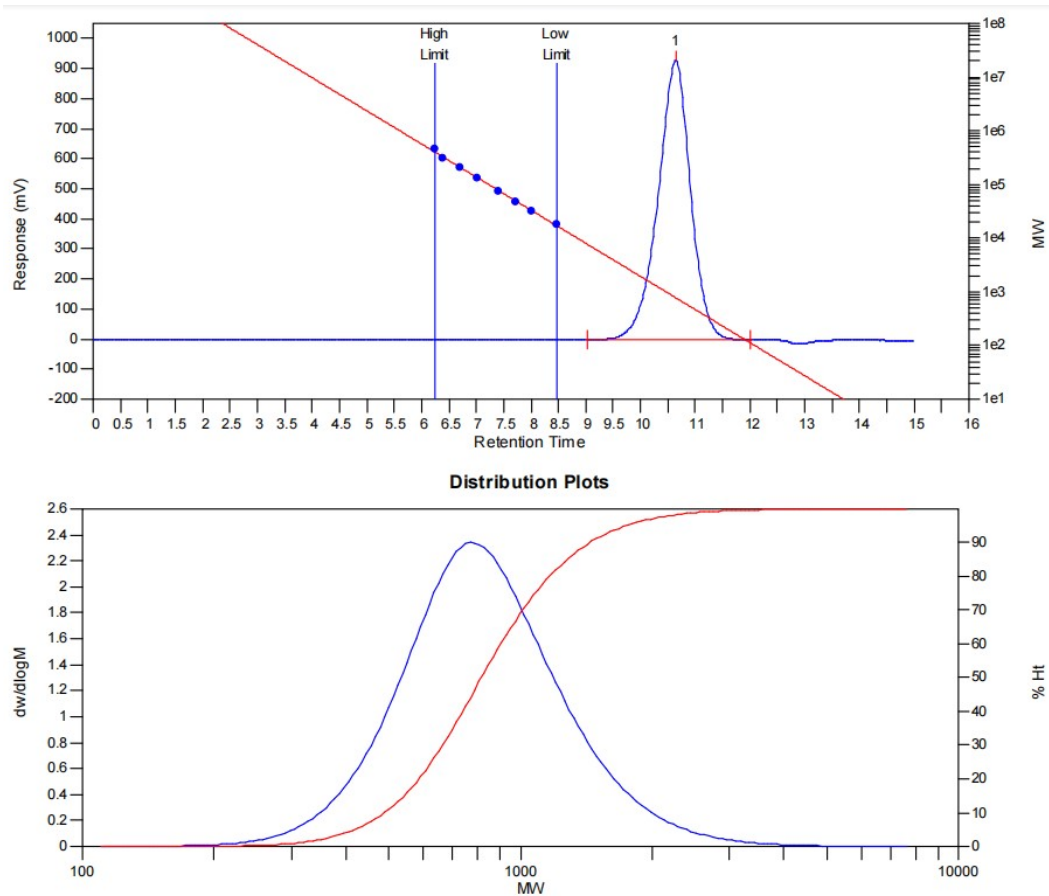

**Supplementary Figure 2.** The GPC profile of inulin. The mobile phase was H<sub>2</sub>O with a flow rate of 1.0 mL/min.
